# Supplementary material
Source: PubMed Central journal article supplement (PMC55837)
Supplement: nar_29_15_e72__1.pdf [file nar_29_15_e72__1.pdf]

## SUPPLEMENTARY MATERIAL

Table S1. LUT, A chip Increased

|             | 1 | 2 | 3 | 4 | 5 | 6 | 7 | 8 |
|-------------|---|---|---|---|---|---|---|---|
| <-100       | 0 | 3 | 6 | 6 | 6 | X | X | X |
| -100 to -50 | 1 | 3 | 5 | 6 | 6 | 6 | X | X |
| -50 to 0    | 1 | 1 | 3 | 6 | 6 | 6 | 6 | 6 |
| 0 to 50     | 0 | 1 | 2 | 4 | 5 | 6 | 6 | 6 |
| 50-100      | 1 | 0 | 1 | 3 | 5 | 5 | 6 | 6 |
| 100-150     | 2 | 0 | 2 | 3 | 5 | 6 | 6 | 6 |
| 150-200     | 1 | 1 | 2 | 4 | 4 | 6 | 6 | 6 |
| 200-250     | 1 | 0 | 3 | 6 | 6 | 6 | 6 | X |
| 250-300     | 2 | 1 | 2 | 4 | 6 | 6 | 6 | X |
| 300-350     | 1 | 2 | 6 | 6 | 6 | 6 | 6 | X |
| 350-450     | 2 | 1 | 2 | 4 | 6 | 6 | 6 | X |
| 450-550     | 2 | 2 | 1 | 3 | 3 | 6 | 6 | X |
| 550-700     | 1 | 2 | 1 | 3 | 6 | 6 | 6 | X |
| 700-850     | 2 | 3 | 5 | 6 | 6 | 6 | X | X |
| 850-1000    | 1 | 5 | 6 | 6 | 6 | 6 | X | X |
| 1000-1200   | 3 | 3 | 4 | 4 | 5 | 6 | X | X |
| 1200-1500   | 2 | 3 | 4 | 6 | 6 | 6 | X | X |
| 1500-1800   | 3 | 5 | 6 | 6 | 6 | 6 | X | X |
| 1800-2200   | 3 | 3 | 6 | 6 | 6 | 6 | X | X |
| 2200-2800   | 4 | 4 | 5 | 6 | 6 | X | X | X |
| 2800-4600   | 3 | 6 | 6 | 6 | 6 | X | X | X |
| >4600       | 6 | X | X | X | X | X | X | X |

**Table S2.** LUT, A Chip Decreased

|             | 1 | 2 | 3 | 4 | 5 | 6 | 7 | 8 |
|-------------|---|---|---|---|---|---|---|---|
| <-100       | 2 | 4 | 5 | 6 | 6 | X | X | X |
| -100 to -50 | 2 | 5 | 6 | 6 | 6 | 6 | X | X |
| -50 to 0    | 1 | 1 | 3 | 6 | 6 | 6 | 6 | 6 |
| 0 to 50     | 0 | 1 | 2 | 5 | 6 | 6 | 6 | 6 |
| 50-100      | 2 | 0 | 1 | 3 | 5 | 6 | 6 | 6 |
| 100-150     | 3 | 1 | 1 | 3 | 5 | 5 | 5 | 6 |
| 150-200     | 2 | 2 | 3 | 3 | 5 | 5 | 6 | 6 |
| 200-250     | 3 | 2 | 3 | 4 | 5 | 5 | 6 | X |
| 250-300     | 3 | 3 | 1 | 2 | 3 | 4 | 6 | X |
| 300-350     | 3 | 1 | 2 | 5 | 6 | 6 | 6 | X |
| 350-450     | 3 | 3 | 2 | 0 | 2 | 4 | 6 | X |
| 450-550     | 3 | 3 | 3 | 2 | 3 | 4 | 5 | X |
| 550-700     | 3 | 3 | 1 | 3 | 4 | 4 | 6 | X |
| 700-850     | 3 | 3 | 2 | 1 | 2 | 4 | X | X |
| 850-1000    | 3 | 1 | 1 | 2 | 4 | 4 | X | X |
| 1000-1200   | 3 | 3 | 2 | 1 | 2 | 3 | X | X |
| 1200-1500   | 3 | 1 | 0 | 3 | 4 | 2 | X | X |
| 1500-1800   | 3 | 1 | 1 | 2 | 2 | 2 | X | X |
| 1800-2200   | 3 | 1 | 2 | 0 | 2 | 2 | X | X |
| 2200-2800   | 3 | 1 | 0 | 1 | 2 | X | X | X |
| 2800-4600   | 1 | 0 | 2 | 3 | 4 | X | X | X |
| >4600       | 5 | X | X | X | X | X | X | X |

**Table S3.** LUT, B Chip Increased

|             | 1 | 2 | 3 | 4 | 5 | 6 | 7 | 8 |
|-------------|---|---|---|---|---|---|---|---|
| <-100       | 0 | 1 | 4 | 6 | 6 | X | X | X |
| -100 to -50 | 0 | 1 | 3 | 4 | 5 | 6 | X | X |
| -50 to 0    | 1 | 0 | 1 | 3 | 4 | 5 | 6 | 6 |
| 0 to 50     | 1 | 0 | 1 | 1 | 2 | 4 | 6 | 6 |
| 50-100      | 2 | 0 | 1 | 2 | 4 | 4 | 4 | 6 |
| 100-150     | 3 | 0 | 2 | 2 | 3 | 6 | 6 | 6 |
| 150-200     | 2 | 1 | 2 | 2 | 2 | 3 | 6 | 6 |
| 200-250     | 3 | 0 | 2 | 4 | 6 | 6 | 6 | X |
| 250-300     | 3 | 1 | 2 | 2 | 4 | 5 | 6 | X |
| 300-350     | 2 | 1 | 2 | 4 | 6 | 6 | 6 | X |
| 350-450     | 3 | 1 | 0 | 2 | 3 | 3 | 6 | X |
| 450-550     | 1 | 1 | 3 | 3 | 3 | 4 | 4 | X |
| 550-700     | 1 | 2 | 2 | 4 | 4 | 6 | 6 | X |
| 700-850     | 3 | 1 | 2 | 3 | 5 | 6 | X | X |
| 850-1000    | 3 | 2 | 3 | 4 | 3 | 5 | X | X |
| 1000-1200   | 3 | 3 | 1 | 4 | 4 | 6 | X | X |
| 1200-1500   | 3 | 2 | 2 | 4 | 5 | 6 | X | X |
| 1500-1800   | 3 | 1 | 3 | 4 | 6 | 6 | X | X |
| 1800-2200   | 2 | 1 | 3 | 5 | 6 | 6 | X | X |
| 2200-2800   | 1 | 2 | 4 | 6 | 6 | X | X | X |
| 2800-4600   | 1 | 2 | 6 | 6 | 6 | X | X | X |
| >4600       | 4 | X | X | X | X | X | X | X |

**Table S4.** LUT, B Chip Decreased

|             | 1 | 2 | 3 | 4 | 5 | 6 | 7 | 8 |
|-------------|---|---|---|---|---|---|---|---|
| <-100       | 0 | 2 | 5 | 6 | 6 | X | X | X |
| -100 to -50 | 0 | 2 | 2 | 3 | 6 | 6 | X | X |
| -50 to 0    | 1 | 0 | 1 | 3 | 4 | 4 | 6 | 6 |
| 0 to 50     | 1 | 0 | 1 | 2 | 3 | 4 | 6 | 6 |
| 50-100      | 3 | 1 | 1 | 2 | 4 | 3 | 3 | 6 |
| 100-150     | 3 | 0 | 3 | 2 | 5 | 5 | 5 | 6 |
| 150-200     | 2 | 2 | 2 | 3 | 2 | 4 | 6 | 6 |
| 200-250     | 3 | 3 | 3 | 2 | 2 | 6 | 6 | X |
| 250-300     | 3 | 3 | 2 | 3 | 3 | 3 | 5 | X |
| 300-350     | 3 | 1 | 4 | 4 | 4 | 4 | 6 | X |
| 350-450     | 3 | 3 | 2 | 2 | 1 | 3 | 4 | X |
| 450-550     | 3 | 3 | 2 | 2 | 2 | 4 | 5 | X |
| 550-700     | 3 | 3 | 0 | 2 | 4 | 3 | 5 | X |
| 700-850     | 3 | 3 | 2 | 2 | 4 | 6 | X | X |
| 850-1000    | 3 | 1 | 2 | 2 | 5 | 6 | X | X |
| 1000-1200   | 3 | 3 | 1 | 2 | 3 | 5 | X | X |
| 1200-1500   | 3 | 1 | 2 | 2 | 4 | 3 | X | X |
| 1500-1800   | 2 | 0 | 4 | 4 | 6 | 6 | X | X |
| 1800-2200   | 3 | 1 | 1 | 4 | 6 | 6 | X | X |
| 2200-2800   | 0 | 2 | 2 | 4 | 6 | X | X | X |
| 2800-4600   | 0 | 2 | 2 | 4 | 6 | X | X | X |
| >4600       | 3 | X | X | X | X | X | X | X |

**Table S5.** Conversion of Average Difference to scaled score

| Average Difference | Scaled Score | Average Difference | Scaled Score | Average Difference | Scaled Score |
|--------------------|--------------|--------------------|--------------|--------------------|--------------|
| -10                | 0            | 770                | 16           | 3250               | 37           |
| 0                  | 0            | 780                | 16           | 3300               | 37           |
| 10                 | 1            | 790                | 16           | 3350               | 37           |
| 20                 | 1            | 800                | 16           | 3400               | 37           |
| 30                 | 1            | 810                | 17           | 3450               | 38           |
| 40                 | 1            | 820                | 17           | 3500               | 38           |
| 50                 | 1            | 830                | 17           | 3550               | 38           |
| 60                 | 2            | 840                | 17           | 3600               | 38           |
| 70                 | 2            | 850                | 17           | 3650               | 39           |
| 80                 | 2            | 860                | 18           | 3700               | 39           |
| 90                 | 2            | 870                | 18           | 3750               | 39           |
| 100                | 2            | 880                | 18           | 3800               | 39           |
| 110                | 3            | 890                | 18           | 3850               | 40           |
| 120                | 3            | 900                | 18           | 3900               | 40           |
| 130                | 3            | 910                | 19           | 3950               | 40           |
| 140                | 3            | 920                | 19           | 4000               | 40           |
| 150                | 3            | 930                | 19           | 4050               | 41           |
| 160                | 4            | 940                | 19           | 4100               | 41           |
| 170                | 4            | 950                | 19           | 4150               | 41           |
| 180                | 4            | 960                | 20           | 4201               | 41           |
| 190                | 4            | 970                | 20           | 4301               | 41           |
| 200                | 4            | 980                | 20           | 4401               | 42           |
| 210                | 5            | 990                | 20           | 4501               | 42           |
| 220                | 5            | 1000               | 20           | 4601               | 42           |
| 230                | 5            | 1010               | 21           | 4701               | 42           |
| 240                | 5            | 1020               | 21           | 4801               | 43           |
| 250                | 5            | 1030               | 21           | 4901               | 43           |
| 260                | 6            | 1040               | 21           | 5001               | 43           |
| 270                | 6            | 1050               | 21           | 5101               | 43           |
| 280                | 6            | 1060               | 21           | 5201               | 44           |
| 290                | 6            | 1070               | 21           | 5301               | 44           |
| 300                | 6            | 1080               | 21           | 5401               | 44           |
| 310                | 7            | 1090               | 21           | 5501               | 44           |
| 320                | 7            | 1100               | 21           | 5601               | 45           |
| 330                | 7            | 1110               | 22           | 5701               | 45           |
| 340                | 7            | 1120               | 22           | 5801               | 45           |
| 350                | 7            | 1150               | 22           | 5901               | 45           |
| 360                | 8            | 1200               | 22           | 6001               | 46           |
| 370                | 8            | 1250               | 23           | 6101               | 46           |
| 380                | 8            | 1300               | 23           | 6201               | 46           |
| 390                | 8            | 1350               | 24           | 6301               | 46           |
| 400                | 8            | 1400               | 24           | 6401               | 47           |
| 410                | 9            | 1450               | 25           | 6501               | 47           |

Table S5. Continued

| Average Difference | Scaled Score | Average Difference | Scaled Score | Average Difference | Scaled Score |
|--------------------|--------------|--------------------|--------------|--------------------|--------------|
| 420                | 9            | 1500               | 25           | 6601               | 47           |
| 430                | 9            | 1550               | 26           | 6701               | 47           |
| 440                | 9            | 1600               | 26           | 6801               | 48           |
| 450                | 9            | 1650               | 27           | 6901               | 48           |
| 460                | 10           | 1700               | 27           | 7001               | 48           |
| 470                | 10           | 1750               | 28           | 7101               | 48           |
| 480                | 10           | 1800               | 28           | 7201               | 49           |
| 490                | 10           | 1850               | 29           | 7301               | 49           |
| 500                | 10           | 1900               | 29           | 7401               | 49           |
| 510                | 11           | 1950               | 30           | 7501               | 49           |
| 520                | 11           | 2000               | 30           | 7601               | 50           |
| 530                | 11           | 2050               | 31           | 7701               | 50           |
| 540                | 11           | 2100               | 31           | 7801               | 50           |
| 550                | 11           | 2150               | 31           | 7901               | 50           |
| 560                | 12           | 2200               | 31           | 8001               | 51           |
| 570                | 12           | 2001               | 31           | 8101               | 51           |
| 580                | 12           | 2300               | 32           | 8201               | 51           |
| 590                | 12           | 2350               | 32           | 8301               | 51           |
| 600                | 12           | 2400               | 32           | 8401               | 52           |
| 610                | 13           | 2450               | 33           | 8799               | 52           |
| 620                | 13           | 2500               | 33           | 8799               | 52           |
| 630                | 13           | 2550               | 33           | 8799               | 52           |
| 640                | 13           | 2600               | 33           | 8800               | 52           |
| 650                | 13           | 2650               | 34           | 8801               | 53           |
| 660                | 14           | 2700               | 34           | 8850               | 53           |
| 670                | 14           | 2750               | 34           | 9001               | 54           |
| 680                | 14           | 2800               | 34           | 9500               | 54           |
| 690                | 14           | 2850               | 35           | 10001              | 55           |
| 700                | 14           | 2900               | 35           | 10999              | 55           |
| 710                | 15           | 2950               | 35           | 11001              | 56           |
| 720                | 15           | 3000               | 35           | 12001              | 57           |
| 730                | 15           | 3050               | 36           | 13001              | 58           |
| 740                | 15           | 3100               | 36           | 14001              | 58           |
| 750                | 15           | 3150               | 36           | 20000              | 58           |
| 760                | 16           | 3200               | 36           |                    |              |

**Table S6.** Matrix used for LUTs score calculations<sup>a</sup>

| Baseline Average Difference | Scaled Average Difference Scores |                |                |                |                |                |                |                |
|-----------------------------|----------------------------------|----------------|----------------|----------------|----------------|----------------|----------------|----------------|
|                             | 1 <sup>b</sup>                   | 2 <sup>b</sup> | 3 <sup>b</sup> | 4 <sup>b</sup> | 5 <sup>b</sup> | 6 <sup>b</sup> | 7 <sup>b</sup> | 8 <sup>b</sup> |
| <-100                       | 0                                | 1-4            | 5-13           | 14-19          | 20             | X              | X              | X              |
| -100 to -50                 | 0                                | 1              | 2              | 3              | 4-5            | 6              | X              | X              |
| -50 to 0                    | 0                                | 1              | 2              | 3              | 4              | 5-7            | 8-11           | >12            |
| 0 to 50                     | <1                               | 2              | 3              | 4              | 5-6            | 7-10           | 11-17          | >18            |
| 50-100                      | <2                               | 3              | 4              | 5              | 6              | 7-8            | 9-15           | >16            |
| 100-150                     | <3                               | 4-5            | 6              | 7-8            | 9-11           | 12-14          | 15-18          | >19            |
| 150-200                     | <5                               | 6              | 7              | 8              | 9-10           | 11-12          | 13-16          | >17            |
| 200-250                     | <6                               | 7-8            | 9-10           | 11-12          | 13-16          | 17-21          | 22             | X              |
| 250-300                     | <6                               | 7-8            | 9-10           | 11-13          | 14-16          | 17-21          | 22             | X              |
| 300-350                     | <9                               | 10-12          | 13-15          | 16-18          | 19-22          | 23-25          | 26             | X              |
| 350-450                     | <9                               | 10-12          | 13-14          | 15-16          | 17-20          | 21-25          | 26             | X              |
| 450-550                     | <12                              | 13-14          | 15-16          | 17-18          | 19-21          | 22-24          | 25             | X              |
| 550-700                     | <16                              | 17-19          | 20-22          | 23-24          | 25-26          | 27-30          | 31             | X              |
| 700-850                     | <20                              | 21-22          | 23-24          | 25-26          | 27-30          | 31             | X              | X              |
| 850-1000                    | <23                              | 24-25          | 26-27          | 28-29          | 30-31          | 32             | X              | X              |
| 1000-1200                   | <22                              | 23-25          | 26-28          | 29-31          | 32-37          | 38             | X              | X              |
| 1200-1500                   | <26                              | 27-30          | 31-33          | 34-37          | 38-40          | 41             | X              | X              |
| 1500-1800                   | <31                              | 32-35          | 36-39          | 40-44          | 45-49          | 50             | X              | X              |
| 1800-2200                   | <33                              | 34-36          | 37-40          | 41-44          | 45-48          | 49             | X              | X              |
| 2200-2800                   | <39                              | 40-41          | 42-44          | 45-47          | 48             | X              | X              | X              |
| 2800-4600                   | <45                              | 46-48          | 49-51          | 52-55          | 56             | X              | X              | X              |
| >4600                       | 0-58                             | X              | X              | X              | X              | X              | X              | X              |

<sup>a</sup>For example, a given probe set in a comparison between partner and baseline Mu11K subA chips is said to be 'Increased' and has a GeneChip Average Difference (AD) of 245 and a Baseline AD (BLAD, calculated as AD - Average Difference Change) of 55. To determine the LUT score manually, one first calculates the scaled AD from the conversion columns in Table S5 (245 scales to 5). The Matrix above is used to find the row where the BLAD of 55 belongs (i.e., in the '50-100' row). The column corresponding to a scaled AD of 5 is found (column 4). The row-column coordinates identify a single 'bin' in the matrix that can then be used in the appropriate LUT ('A Chip Increased' in this case) to find the LUT score. In this example, the LUT score for BLAD 55 bin 4 in Table S1 is a '3'. LUT scores range from 0 to 6, with 6 being most likely to be a 'real' change.

<sup>b</sup>Column number.
